# Supplementary material
Source: PubMed Central journal article supplement (PMC5762419)
Supplement: NIHMS914866-supplement.pdf [file NIHMS914866-supplement.pdf]

## Supplemental Information

**Table S1**

| <b>DAG</b>            | <b>T2D</b>        | <b>T2D + VLCD</b> |
|-----------------------|-------------------|-------------------|
| PO C18_1 C16          | 46.6±6.7          | 31.6±5.0          |
| AE C20_4 C20_5        | 107.3±7.2         | 67.3±4.8***       |
| AP C16 C20_4          | 5.1±0.4           | 3.3±0.2**         |
| AS C18 C20_4          | 3.7±0.2           | 2.5±0.2**         |
| SS C18,C18            | 3.9±0.7           | 3.8±0.3           |
| LS C18_2,C18          | 11.8±1.7          | 7.8±0.9           |
| OS C18_2,C18          | 5.0±0.8           | 3.9±0.7           |
| PP C16,C16            | 14.1±3.2          | 12.7±2.2          |
| SP C18,C16            | 7.0±1.1           | 5.8±0.7           |
| OO C18_1              | 33.5±4.7          | 25.1±4.8          |
| OL C18_1,C18_1        | 57.8±9.5          | 38.0±7.0          |
| LL C18_2,C18_2        | 81.8±16.4         | 60.0±11.7         |
| PL C16,C18_2          | 119.4±16.5        | 76.8±9.8          |
| <b>Total DAG</b>      | <b>497.1±57.3</b> | <b>343.4±37.8</b> |
|                       |                   |                   |
| <b>Ceramide</b>       | <b>T2D</b>        | <b>T2D + VLCD</b> |
| C16                   | 50.1±5.0          | 54.4±2.8          |
| C18                   | 8.5±0.9           | 9.9±0.8           |
| C20                   | 42.8±10.9         | 47.8±11.7         |
| C22                   | 39.6±4.7          | 44.7±4.5          |
| C24:1                 | 15.0±1.3          | 16.7±0.9          |
| C24                   | 50.2±5.0          | 56.4±2.7          |
| <b>Total ceramide</b> | <b>206.2±23.4</b> | <b>229.8±22.1</b> |

**Table S1, related to Fig. 1.** Individual DAG and ceramide species. Data are the mean±S.E.M. of n=6 per group, with \* $P$ <0.05, \*\* $P$ <0.01 and \*\*\* $P$ <0.001 by the 2-tailed unpaired Student's t-test.

# Figure S1

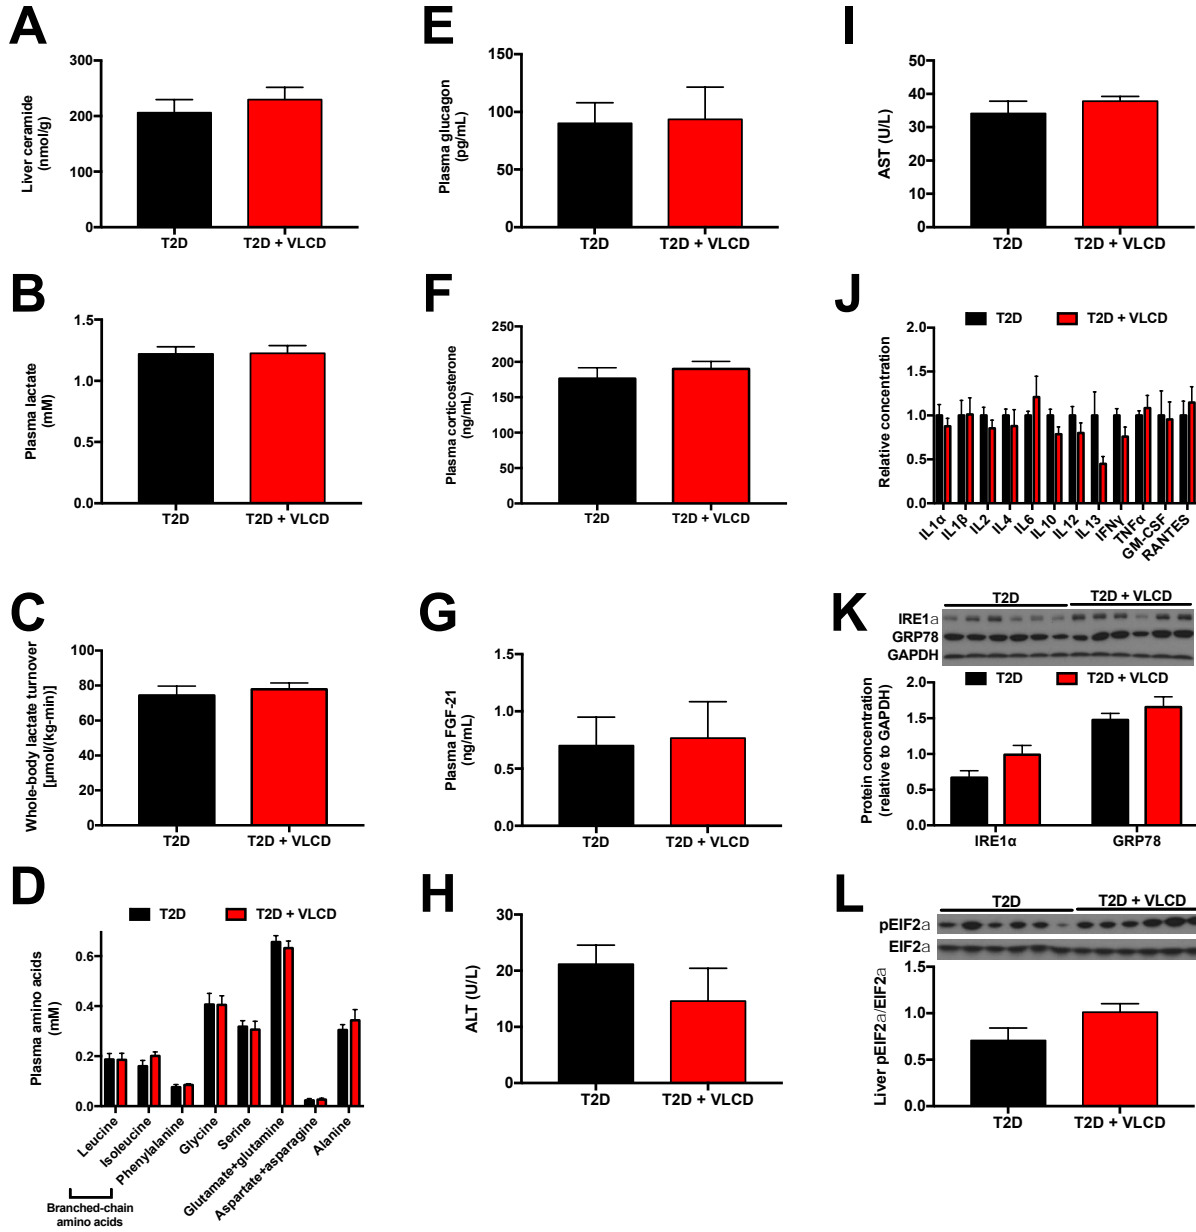

**Fig. S1, related to Fig. 1.** Caloric restriction reverses fasting hyperglycemia in a rat model of T2D without any alterations in gluconeogenic substrates (lactate, alanine, amino acids), gluconeogenic hormones (corticosterone, glucagon), FGF-21 or hepatic ceramide content. (A) Liver ceramide content. (B)-(C) Plasma lactate and whole-body lactate turnover. (D) Plasma amino acid concentrations. (E)-(G) Plasma glucagon, corticosterone, and FGF-21. (H)-(I) Plasma ALT and AST. (J) Liver inflammatory cytokine concentrations. (K)-(L) ER stress markers. In all panels, data are the mean  $\pm$  S.E.M. of  $n=6$  per group, with no differences by the 2-tailed unpaired Student's *t*-test.

## Figure S2

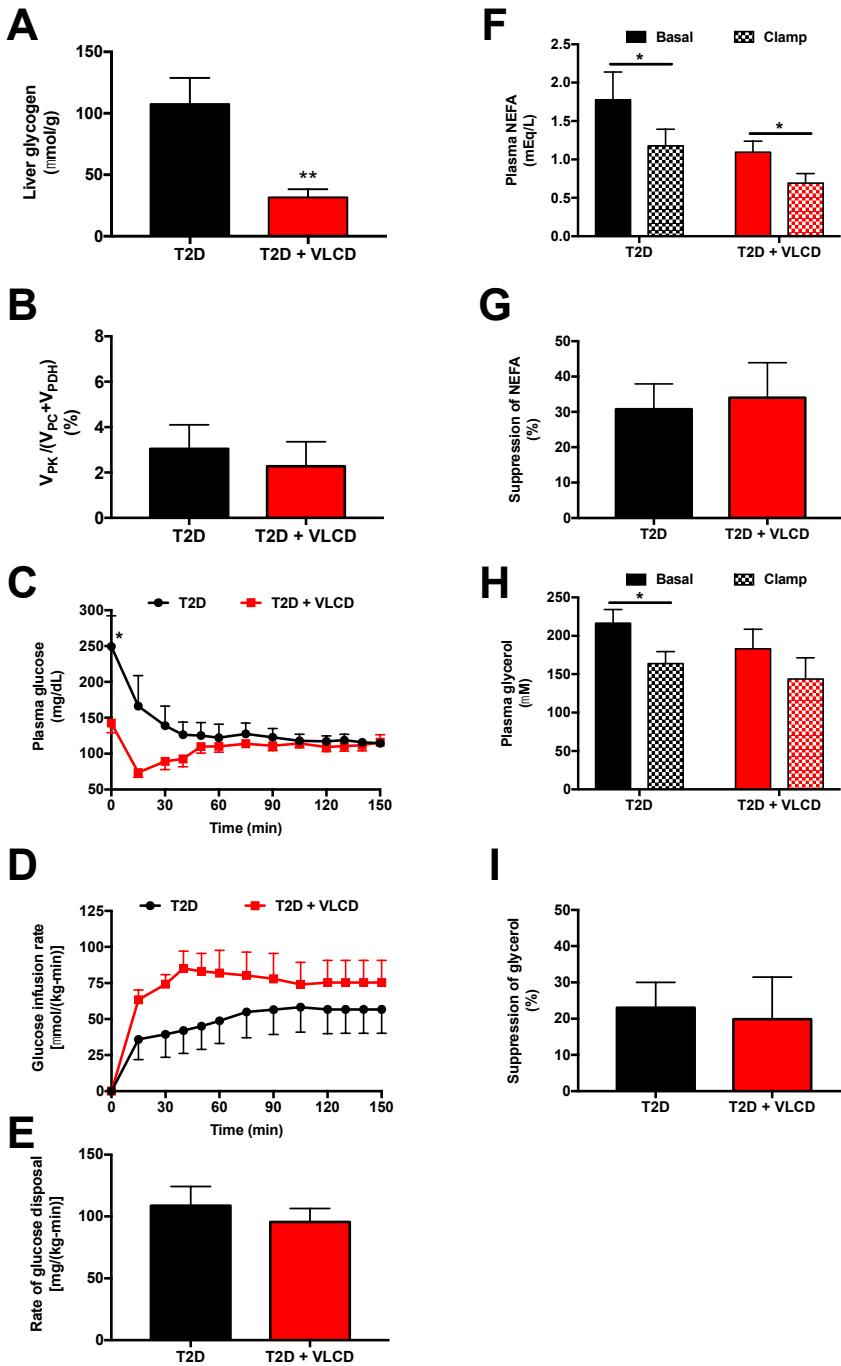

**Fig. S2, related to Fig. 2.** Liver glycogen content is reduced and hepatic insulin sensitivity is improved in VLCD rats. (A) Liver glycogen in 8 hr fasted rats. \*\* $P < 0.01$  by the 2-tailed unpaired Student's t-test.  $n = 6$  per group. (B) Ratio of hepatic pyruvate kinase flux to the sum of pyruvate carboxylase and pyruvate dehydrogenase flux.  $n = 5$  per group. (C)-(D) Plasma glucose and glucose infusion rate required to maintain euglycemia during a hyperinsulinemic-euglycemic clamp. In panels (C)-(I),  $n = 6$  per group. (E) Insulin-stimulated glucose disposal rate. (F)-(G) Plasma NEFA and suppression of NEFA concentrations during the clamp. In panels (F) and (H), \* $P < 0.05$  by the 2-tailed paired Student's t-test. (H)-(I) Plasma glycerol and suppression of glycerol concentrations during the clamp. In all panels, data are the mean  $\pm$  S.E.M.

## Figure S3

A

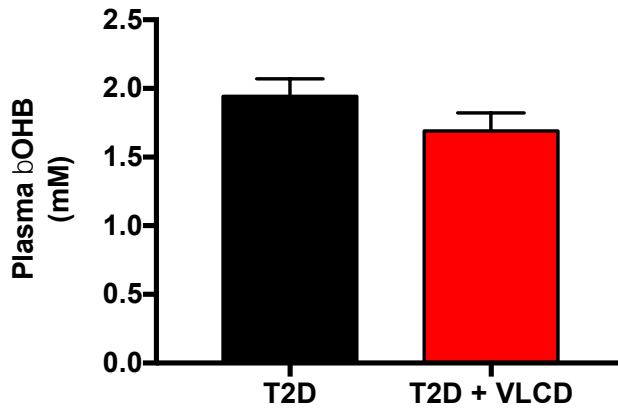

B

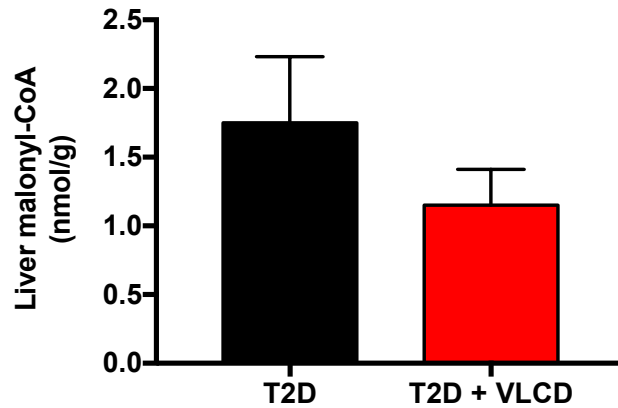

C

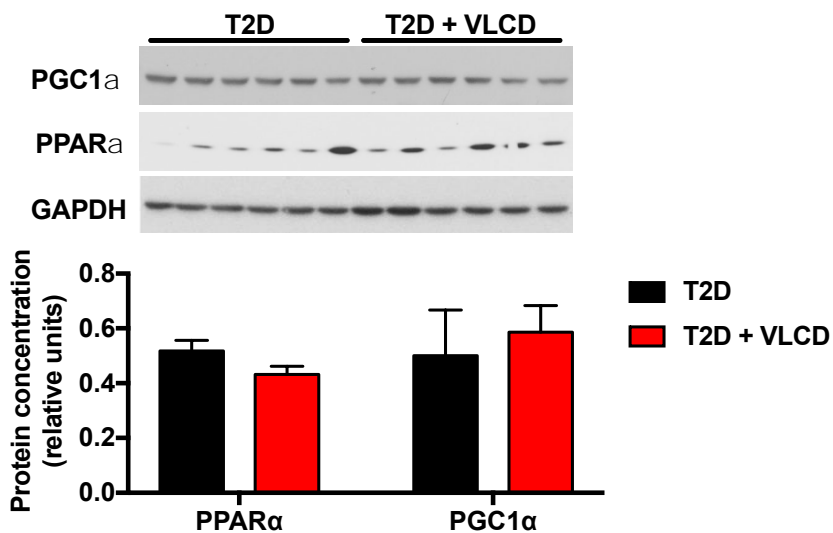

**Fig. S3, related to Fig. 3.** A very low calorie diet does not alter hepatic mitochondrial oxidation. (A) Plasma  $\beta$ OHB. (B) Liver malonyl-CoA. (C) Hepatic PPAR $\alpha$  and PGC1 $\alpha$  protein expression, normalized to GAPDH. In all panels, data are the mean  $\pm$  S.E.M. of  $n=6$  per group. No significant differences were observed with the 2-tailed unpaired Student's t-test.

# Figure S4

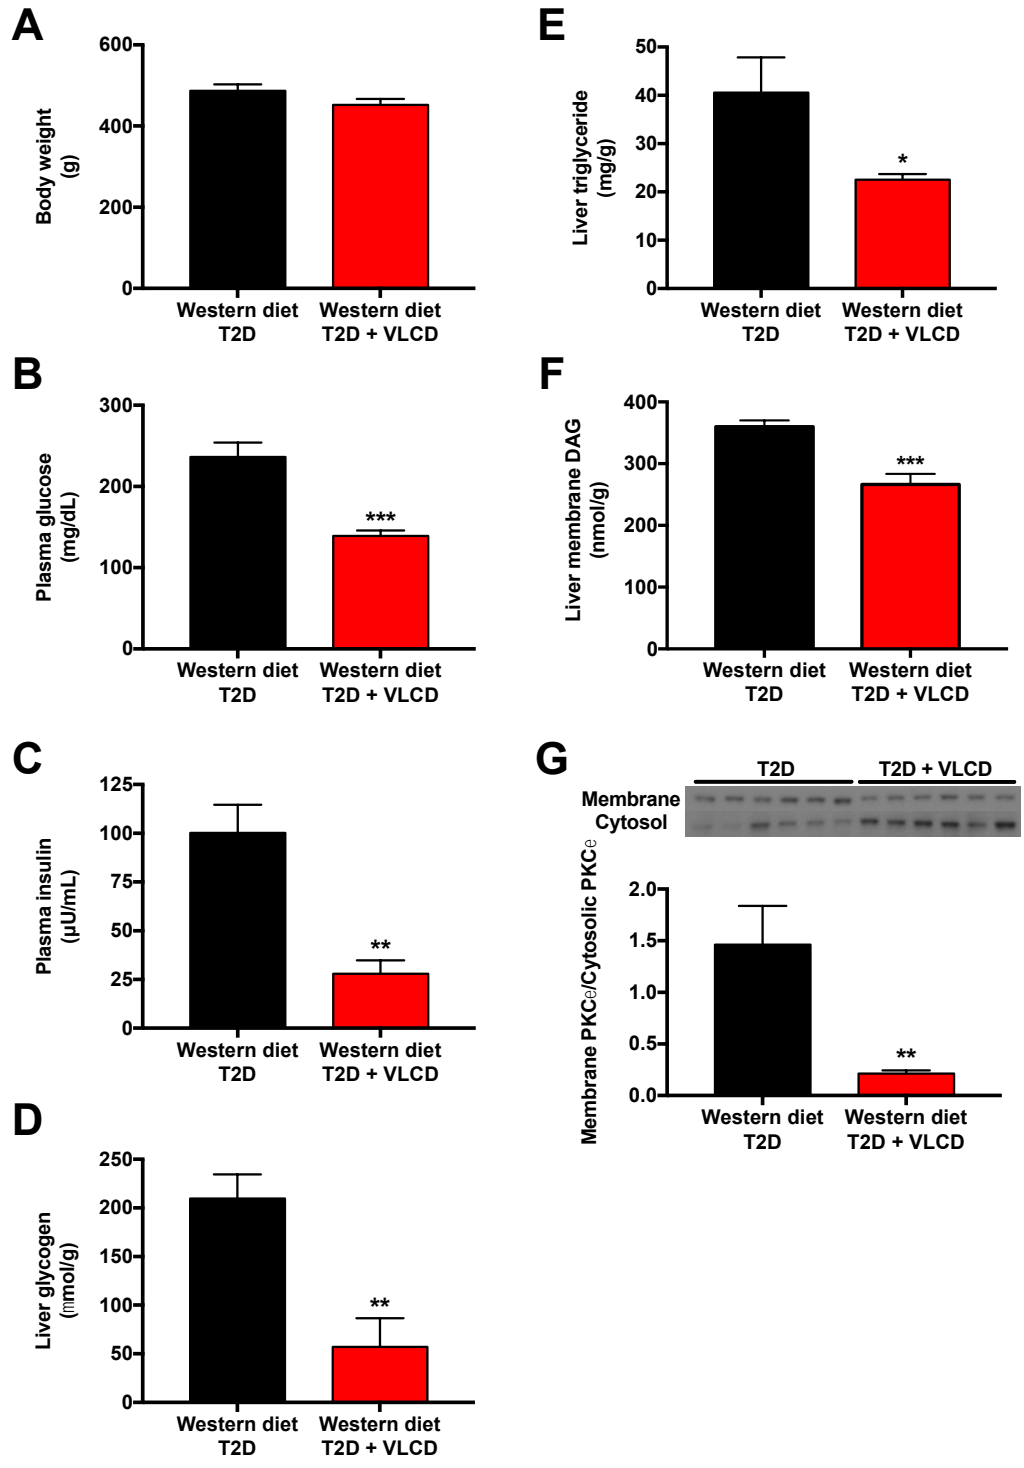

**Fig. S4, related to Fig. 4.** VLCD reverses hyperglycemia in Western diet fed rats. (A) Body weight. (B)-(C) Plasma glucose and insulin concentrations following an 8 hr fast. (D) Liver glycogen concentrations. (E)-(G) Hepatic TAG, DAG, and membrane/cytosolic PKC $\epsilon$  protein expression. Data are the mean $\pm$ S.E.M. of n=6 per group. In all panels, \* $P$ <0.05, \*\* $P$ <0.01, \*\*\* $P$ <0.001 by the 2-tailed unpaired Student's t-test.
